# Supplementary material
Source: Springer Nature journal article supplement (https://www.springermedizin.de/resource/supplementary/12911_2011_458_MOESM4_ESM.pdf/9525788)

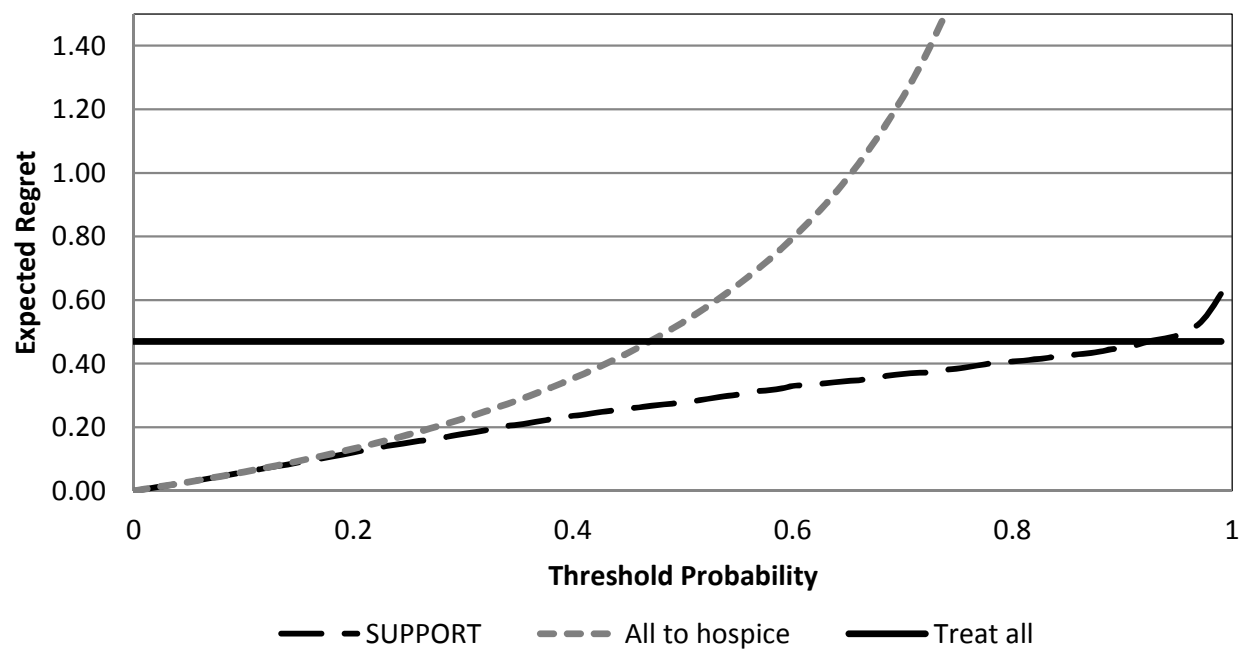

Supplement: MOESM4 [file 9525788]
